# Supplementary material
Source: Springer Nature journal article supplement (https://www.springermedizin.de/resource/supplementary/12885_2012_3342_MOESM7_ESM.pdf/9463276)

**a**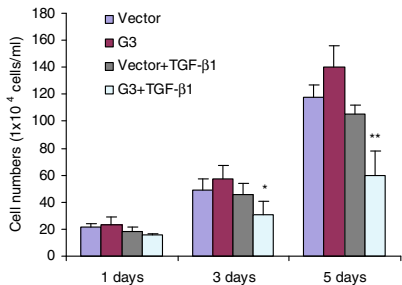**b**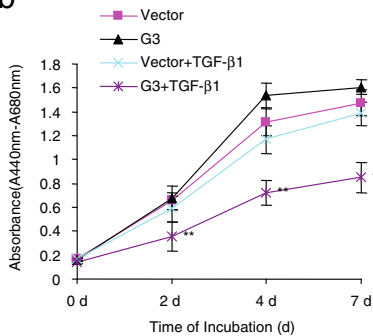**c**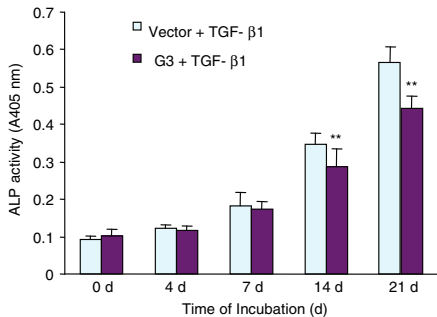**e**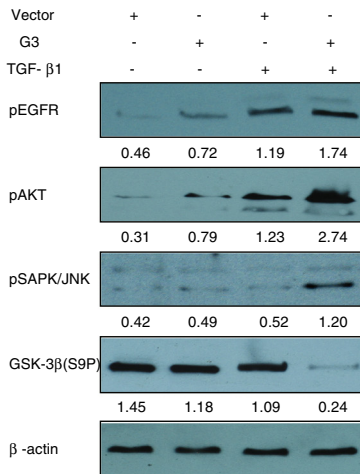**d**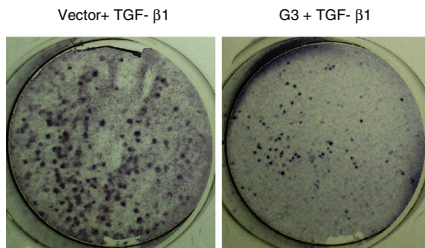

Supplement: MOESM7 [file 9463276]
